# Supplementary material for: Cross Sectional Study and Risk Factors Analysis of Francisella tularensis in Soil Samples in Punjab Province of Pakistan
Source: Front Cell Infect Microbiol. 2019 Apr 5;9:89. doi: 10.3389/fcimb.2019.00089 (PMC6460113; doi:10.3389/fcimb.2019.00089)
Supplement: Supplementary file 1 [file Table_1.docx]

***Supplementary Material***

**Prevalence and risk factors analysis of *Francisella tularensis* in soil samples; findings of a cross-sectional study in Punjab province of Pakistan**

Javed Muhammad14, Masood Rabbani1*, Muhammad Zubair Shabbir1, Khushi Muhammad1, Muhammad Taslim Ghori2, Haroon Rashid Chaudhry2, Zia Ul Hassnain1, Tariq Abbas2, Muhammad Hamid Chaudhry3, Muhammad Haisem-ur-Rasool1, Muhammad Asad Ali1, Tariq Jamil1, Muhammad Nisar1, Girish S Kirimanjeswara5, Bhushan M Jayarao5

**Affiliations:** 1University of Veterinary and Animal Sciences, Lahore, Pakistan;2University College of Veterinary and Animal Sciences, The Islamia University, Bahawalpur, Pakistan; 3University of the Punjab, Lahore, Pakistan; 5The Pennsylvania State University, University Park, PA, USA

Corresponding author*: Dr. Masood Rabbani [mrabbani@uvas.edu.pk](mailto:mrabbani@uvas.edu.pk)

4University of Swabi, Anbar, Pakistan,


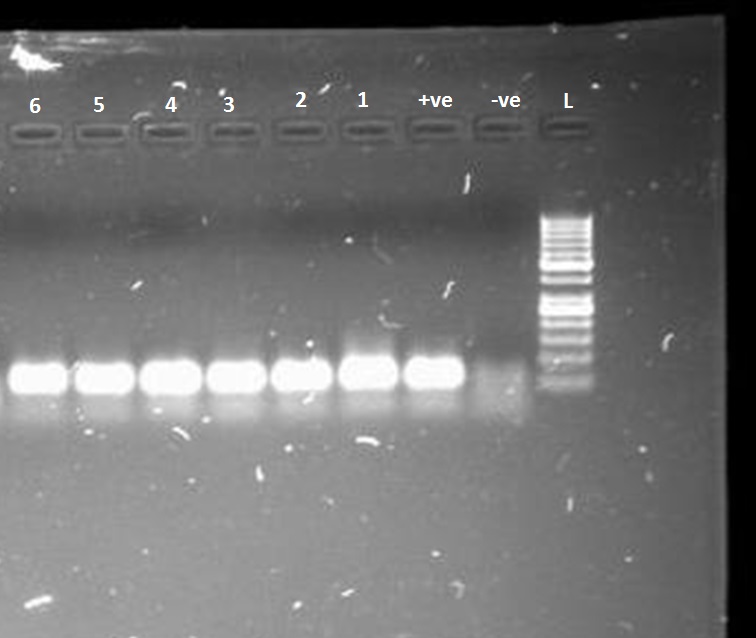


Figure 1: Gel electrophoresis of Real Time PCR products of *Francisella tularensis* tul4 gene (103 bp)

L: ladder (100 bp), -ve: Negative control, +ve: Positive control 1-6: Samples
